# Supplementary material for: Cage-incorporation of secondary amine in Ruddlesden–Popper 2D hybrid perovskite with strong photoconductivity and polarization response
Source: Royal Society of Chemistry journal article supplement (doi:10.1039/d1tc05064h), 2021-01-01
Supplement: d1tc05064h1.pdf [file d1tc05064h1.pdf]

## Supporting Information

### Cage-Incorporation of Secondary Amine in Ruddlesden-Popper 2D Hybrid Perovskite with Strong Photoconductivity and Polarization Response

Beibei Wang,<sup>a</sup> Huaixi Chen,<sup>b</sup> Wuqian Guo,<sup>b</sup> Yi Liu,<sup>b</sup> Shiguo Han,<sup>b</sup> Lina Hua,<sup>b</sup> Liwei Tang,<sup>b</sup> Junhua Luo<sup>b</sup> and Zhihua Sun<sup>\*a, b, c</sup>

<sup>a</sup> College of Chemistry, Fuzhou University, Fuzhou 350116, China

<sup>b</sup> State Key Laboratory of Structure Chemistry, Fujian Institute of Research on the Structure of Matter, Chinese Academy of Sciences, Fuzhou 350002, China

<sup>c</sup> Fujian Science & Technology Innovation Laboratory for Optoelectronic Information of China, Fuzhou, Fujian 350108, P. R. China

E-mail: sunzhihua@fjirsm.ac.cn.

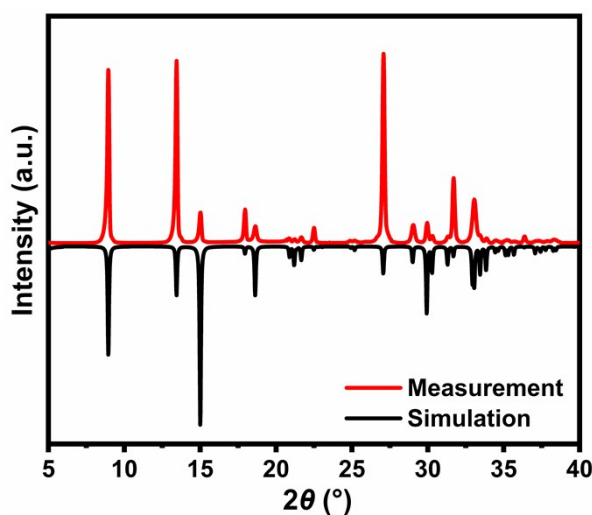

Figure S1. Experimental and calculated powder X-ray diffraction patterns of **1** at room temperature.

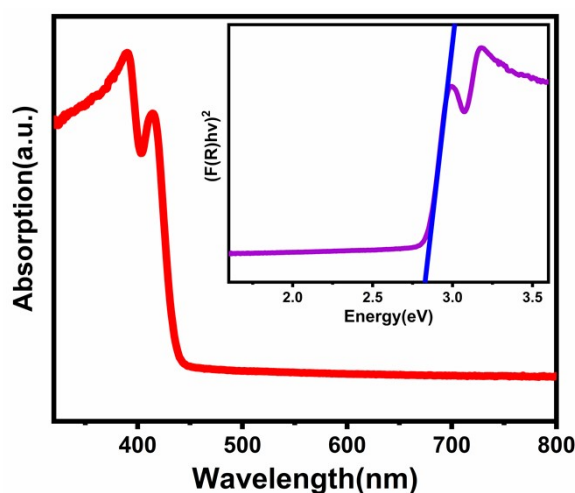

Figure S2. Optical absorption spectrum (Inset: the calculated bandgap) of  $(\text{BA})_2\text{PbBr}_4$ .

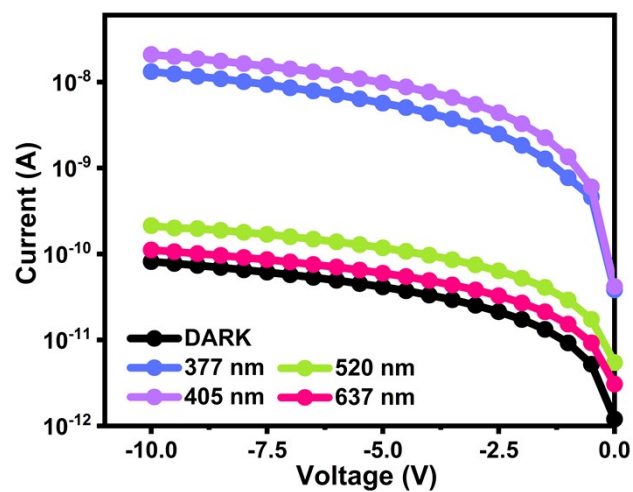

Figure S3:  $I$ - $V$  traces of **1** measured under different wavelength.

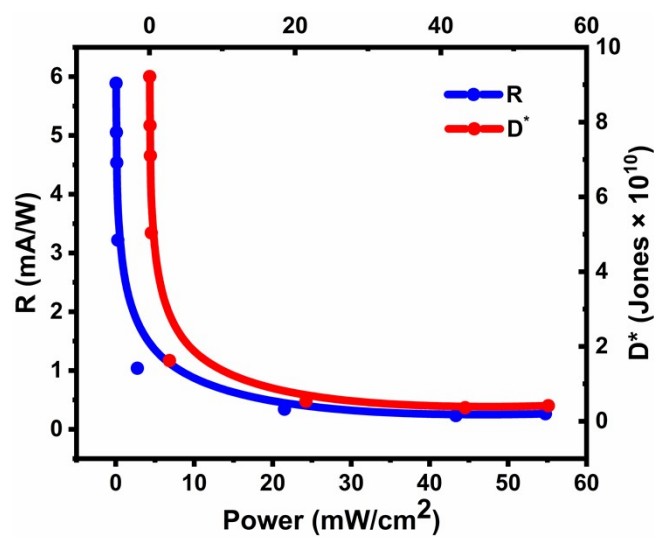

Figure S4. Detectivity  $D^*$  and responsivity  $R$  of the single crystal of **1** under changed incident light power.

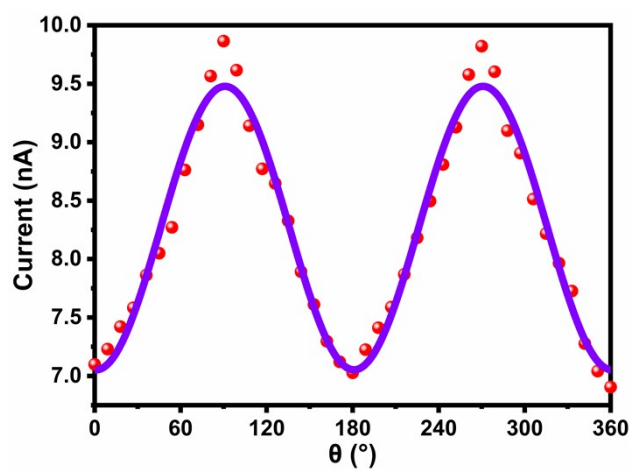

Figure S5. Polarization-dependent photocurrents.

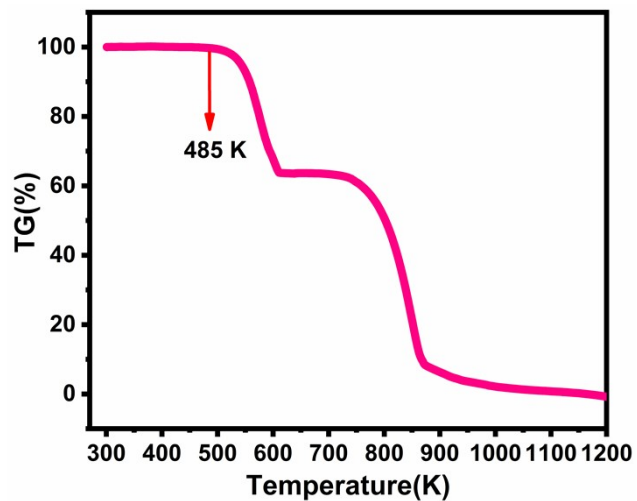

Figure S6. Thermal analysis of 1 showing its thermal stability up to ~485 K.

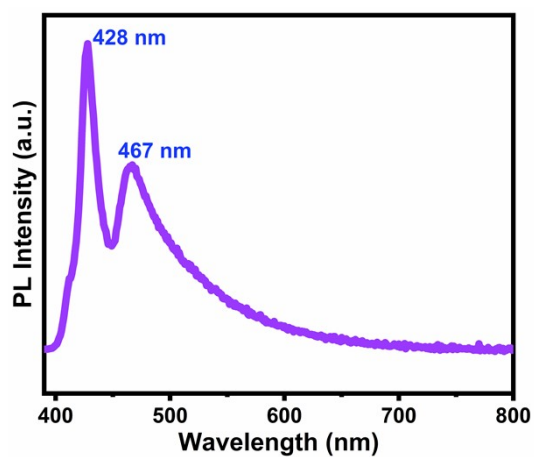

Figure S7. Photoluminescence (PL) spectra of 1.

**Tables**

**Table S1** Crystal data and structure refinement for **1**.

|                                                              |                                                                                |
|--------------------------------------------------------------|--------------------------------------------------------------------------------|
| Empirical formula                                            | C <sub>10</sub> H <sub>32</sub> Br <sub>7</sub> N <sub>3</sub> Pb <sub>2</sub> |
| Formula weight                                               | 1168.13                                                                        |
| Temperature/K                                                | 300.0                                                                          |
| Crystal system                                               | monoclinic                                                                     |
| Space group                                                  | <i>C2/m</i>                                                                    |
| <i>a</i> /Å                                                  | 8.379(3)                                                                       |
| <i>b</i> /Å                                                  | 8.498(2)                                                                       |
| <i>c</i> /Å                                                  | 20.187(8)                                                                      |
| $\alpha$ /°                                                  | 90                                                                             |
| $\beta$ /°                                                   | 101.917(13)                                                                    |
| $\gamma$ /°                                                  | 90                                                                             |
| Volume/Å <sup>3</sup>                                        | 1406.5(8)                                                                      |
| Z                                                            | 2                                                                              |
| $\rho_{\text{calc}}$ /cm <sup>3</sup>                        | 2.758                                                                          |
| $\mu$ /mm <sup>-1</sup>                                      | 21.898                                                                         |
| <i>F</i> (000)                                               | 1044.0                                                                         |
| Radiation                                                    | MoK $\alpha$ ( $\lambda$ = 0.71073)                                            |
| 2 $\theta$ range for data collection/°                       | 6.906 to 49.984                                                                |
| Index ranges                                                 | -9 ≤ <i>h</i> ≤ 9, -10 ≤ <i>k</i> ≤ 10, -24 ≤ <i>l</i> ≤ 24                    |
| Reflections collected                                        | 15109                                                                          |
| Independent reflections                                      | 1316 [ <i>R</i> <sub>int</sub> = 0.0893, <i>R</i> <sub>sigma</sub> = 0.0454]   |
| Data/restraints/parameters                                   | 1316/95/105                                                                    |
| Goodness-of-fit on <i>F</i> <sup>2</sup>                     | 1.093                                                                          |
| Final <i>R</i> indexes [ <i>I</i> ≥ 2 $\sigma$ ( <i>I</i> )] | <i>R</i> <sub>1</sub> = 0.0757, <i>wR</i> <sub>2</sub> = 0.2239                |
| Final <i>R</i> indexes [all data]                            | <i>R</i> <sub>1</sub> = 0.0812, <i>wR</i> <sub>2</sub> = 0.2313                |
| Largest diff. peak/hole / e Å <sup>-3</sup>                  | 1.72/-2.97                                                                     |

**Table S2** Bond Lengths for **1**.

| Atom              | Atom               | Length/Å   | Atom              | Atom               | Length/Å  |
|-------------------|--------------------|------------|-------------------|--------------------|-----------|
| Pb <sup>(1)</sup> | Br <sup>(3)</sup>  | 2.847(2)   | Br <sup>(3)</sup> | Br <sup>(3)1</sup> | 0.964(4)  |
| Pb <sup>(1)</sup> | Br <sup>(3)1</sup> | 2.847(2)   | N <sup>(2)</sup>  | C <sup>(6)</sup>   | 1.509(12) |
| Pb <sup>(1)</sup> | Br <sup>(2)2</sup> | 2.9864(11) | C <sup>(6)</sup>  | C <sup>(5)</sup>   | 1.493(10) |
| Pb <sup>(1)</sup> | Br <sup>(2)3</sup> | 2.9864(11) | C <sup>(5)</sup>  | C <sup>(4)</sup>   | 1.488(12) |
| Pb <sup>(1)</sup> | Br <sup>(2)</sup>  | 2.9855(11) | C <sup>(4)</sup>  | C <sup>(3)</sup>   | 1.502(13) |
| Pb <sup>(1)</sup> | Br <sup>(2)1</sup> | 2.9855(11) | C <sup>(2)</sup>  | N <sup>(1)</sup>   | 1.497(13) |
| Pb <sup>(1)</sup> | Br <sup>(1)</sup>  | 3.1901(13) | N <sup>(1)</sup>  | C <sup>(1)</sup>   | 1.502(13) |

<sup>1</sup>+*X*, 1-*Y*, +*Z*; <sup>2</sup>1/2+*X*, 1/2-*Y*, +*Z*; <sup>3</sup>1/2+*X*, 1/2+*Y*, +*Z*

**Table S3** Bond Angles for **1**.

| Atom               | Atom              | Atom               | Angle/°   | Atom               | Atom              | Atom               | Angle/°   |
|--------------------|-------------------|--------------------|-----------|--------------------|-------------------|--------------------|-----------|
| Br <sup>(3)</sup>  | Pb <sup>(1)</sup> | Br <sup>(3)1</sup> | 19.50(8)  | Br <sup>(2)1</sup> | Pb <sup>(1)</sup> | Br <sup>(2)3</sup> | 89.10(2)  |
| Br <sup>(3)</sup>  | Pb <sup>(1)</sup> | Br <sup>(2)2</sup> | 80.91(7)  | Br <sup>(2)</sup>  | Pb <sup>(1)</sup> | Br <sup>(2)2</sup> | 89.10(2)  |
| Br <sup>(3)</sup>  | Pb <sup>(1)</sup> | Br <sup>(2)</sup>  | 80.76(7)  | Br <sup>(2)3</sup> | Pb <sup>(1)</sup> | Br <sup>(2)2</sup> | 90.69(4)  |
| Br <sup>(3)1</sup> | Pb <sup>(1)</sup> | Br <sup>(2)</sup>  | 94.62(7)  | Br <sup>(2)1</sup> | Pb <sup>(1)</sup> | Br <sup>(1)</sup>  | 92.30(3)  |
| Br <sup>(3)1</sup> | Pb <sup>(1)</sup> | Br <sup>(2)3</sup> | 80.91(7)  | Br <sup>(2)2</sup> | Pb <sup>(1)</sup> | Br <sup>(1)</sup>  | 92.21(3)  |
| Br <sup>(3)</sup>  | Pb <sup>(1)</sup> | Br <sup>(2)1</sup> | 94.62(7)  | Br <sup>(2)</sup>  | Pb <sup>(1)</sup> | Br <sup>(1)</sup>  | 92.30(3)  |
| Br <sup>(3)1</sup> | Pb <sup>(1)</sup> | Br <sup>(2)2</sup> | 94.76(7)  | Br <sup>(2)3</sup> | Pb <sup>(1)</sup> | Br <sup>(1)</sup>  | 92.21(3)  |
| Br <sup>(3)</sup>  | Pb <sup>(1)</sup> | Br <sup>(2)3</sup> | 94.76(7)  | Br <sup>(3)1</sup> | Br <sup>(3)</sup> | Pb <sup>(1)</sup>  | 80.25(4)  |
| Br <sup>(3)1</sup> | Pb <sup>(1)</sup> | Br <sup>(2)1</sup> | 80.77(7)  | Pb <sup>(1)</sup>  | Br <sup>(2)</sup> | Pb <sup>(1)4</sup> | 175.49(6) |
| Br <sup>(3)1</sup> | Pb <sup>(1)</sup> | Br <sup>(1)</sup>  | 170.25(4) | Pb <sup>(1)5</sup> | Br <sup>(1)</sup> | Pb <sup>(1)</sup>  | 180.0     |
| Br <sup>(3)</sup>  | Pb <sup>(1)</sup> | Br <sup>(1)</sup>  | 170.25(4) | C <sup>(5)</sup>   | C <sup>(6)</sup>  | N <sup>(2)</sup>   | 112.2(11) |
| Br <sup>(2)</sup>  | Pb <sup>(1)</sup> | Br <sup>(2)3</sup> | 175.49(6) | C <sup>(4)</sup>   | C <sup>(5)</sup>  | C <sup>(6)</sup>   | 114.2(10) |
| Br <sup>(2)1</sup> | Pb <sup>(1)</sup> | Br <sup>(2)2</sup> | 175.49(6) | C <sup>(5)</sup>   | C <sup>(4)</sup>  | C <sup>(3)</sup>   | 116.6(11) |
| Br <sup>(2)</sup>  | Pb <sup>(1)</sup> | Br <sup>(2)1</sup> | 90.75(4)  | C <sup>(2)</sup>   | N <sup>(1)</sup>  | C <sup>(1)</sup>   | 113.6(15) |

<sup>1</sup>+X, 1-Y, +Z; <sup>2</sup>1/2+X, 1/2-Y, +Z; <sup>3</sup>1/2+X, 1/2+Y,+Z; <sup>4</sup>-1/2+X, -1/2+Y, +Z; <sup>5</sup>1-X, 1-Y, 1-Z

**Table S4** N-H...Br Hydrogen bonds of **1** at 300 K.

| D-H                               | d(D-H) | d(H..A) | <DHA   | d(D..A) | A                        |
|-----------------------------------|--------|---------|--------|---------|--------------------------|
| N1 <sup>a</sup> -H1B <sup>a</sup> | 0.890  | 2.728   | 169.77 | 3.607   | Br1 [ x-1, y, z ]        |
| N2 <sup>a</sup> -H2A <sup>a</sup> | 0.890  | 2.641   | 128.50 | 3.270   | Br3 [ x+1/2, y-1/2, z ]  |
| N2 <sup>a</sup> -H2A <sup>a</sup> | 0.890  | 1.689   | 131.93 | 2.378   | Br3 [ x+1/2, -y+1/2, z ] |
| N2 <sup>a</sup> -H2B <sup>a</sup> | 0.890  | 2.187   | 152.62 | 3.006   | Br2 [ x+1/2, -y+1/2, z ] |
| N2 <sup>a</sup> -H2C <sup>a</sup> | 0.890  | 1.760   | 137.34 | 2.489   | Br2 [ x+1, y, z ]        |

**Table S5** Absorption cutoff wavelengths, bandgaps and PL peak position of **1**, (DMA)PbBr<sub>3</sub>, (DMA)<sub>7</sub>Pb<sub>4</sub>Br<sub>15</sub> and (BA)<sub>2</sub>PbBr<sub>4</sub>.

| Compound                                            | Absorption cutoff wavelength (nm) | Bandgap (eV) | PL peak                  |
|-----------------------------------------------------|-----------------------------------|--------------|--------------------------|
| <b>1</b>                                            | 466                               | 2.67         | at 467 nm                |
| (DMA)PbBr <sub>3</sub>                              | 425                               | 3.0          | at 620 nm                |
| (DMA) <sub>7</sub> Pb <sub>4</sub> Br <sub>15</sub> | 425                               | 2.8          | at 438 nm                |
| (BA) <sub>2</sub> PbBr <sub>4</sub>                 | 439                               | 2.83         | at 411 nm <sup>[1]</sup> |

[1] L. Dou, A. B. Wong, Y. Yu, M. Lai, N. Kornienko, S. W. Eaton, A. Fu, C. G. Bischak, J. Ma, T. Ding, N. S. Ginsberg, L.-W. Wang, A. P. Alivisatos and P. Yang, *Science*, 2015, **349**, 1518-1521.

**Table S6** Figure-of-merits for some photodetectors based on 2D perovskites.

|                                                                                                                                                   | Responsivity<br>(mA W <sup>-1</sup> ) | Detectivity<br>(Jones) | Response time                                                                       | Ref |
|---------------------------------------------------------------------------------------------------------------------------------------------------|---------------------------------------|------------------------|-------------------------------------------------------------------------------------|-----|
| Our work                                                                                                                                          | 31.1                                  | $2.0 \times 10^{11}$   | $\tau_{\text{rise}} = 20 \mu\text{s}$<br>$\tau_{\text{decay}} = 8 \mu\text{s}$      |     |
| (BA) <sub>2</sub> (GA)Pb <sub>2</sub> I <sub>7</sub>                                                                                              | 12.01                                 | $3.3 \times 10^{11}$   | $\tau_{\text{rise}} = 320 \mu\text{s}$<br>$\tau_{\text{decay}} = 315 \mu\text{s}$   | [1] |
| (iso-BA) <sub>2</sub> (MA)Pb <sub>2</sub> I <sub>7</sub>                                                                                          | 12.1                                  | $1.05 \times 10^{11}$  | $\tau_{\text{rise}} = 310 \mu\text{s}$<br>$\tau_{\text{decay}} = 370 \mu\text{s}$   | [2] |
| (C <sub>4</sub> H <sub>9</sub> NH <sub>3</sub> ) <sub>2</sub> (MA) <sub>2</sub> Pb <sub>3</sub> Br <sub>10</sub>                                  |                                       | $3.6 \times 10^{10}$   | $\tau_{\text{rise}} = 150 \mu\text{s}$<br>$\tau_{\text{decay}} = 570 \mu\text{s}$   | [3] |
| (C <sub>4</sub> H <sub>9</sub> NH <sub>3</sub> ) <sub>2</sub> (CH <sub>3</sub> NH <sub>3</sub> )Pb <sub>2</sub> I <sub>7</sub>                    | 7.3                                   |                        |                                                                                     | [4] |
| (C <sub>4</sub> H <sub>9</sub> NH <sub>3</sub> ) <sub>2</sub> PbI <sub>4</sub>                                                                    | 3.0                                   |                        |                                                                                     |     |
| (C <sub>5</sub> H <sub>11</sub> NH <sub>3</sub> ) <sub>2</sub> (CH <sub>3</sub> NH <sub>3</sub> )Pb <sub>2</sub> I <sub>7</sub>                   | 3.8                                   | $2.9 \times 10^{10}$   | $\tau_{\text{rise}} = 1.52 \mu\text{s}$<br>$\tau_{\text{decay}} = 1.67 \mu\text{s}$ | [5] |
| [CH <sub>3</sub> (CH <sub>2</sub> ) <sub>3</sub> NH <sub>3</sub> ] <sub>2</sub> (CH <sub>3</sub> NH <sub>3</sub> )Pb <sub>2</sub> Br <sub>7</sub> |                                       | $1.1 \times 10^{10}$   | $\tau_{\text{rise}} = 20 \mu\text{s}$<br>$\tau_{\text{decay}} = 28 \mu\text{s}$     | [6] |
| (EA) <sub>2</sub> (MA) <sub>2</sub> Pb <sub>3</sub> Br <sub>10</sub>                                                                              | 1.35                                  | $1.16 \times 10^9$     | $\tau_{\text{rise}} = 96 \mu\text{s}$<br>$\tau_{\text{decay}} = 123 \mu\text{s}$    | [7] |
| (AMP)(MA)Pb <sub>2</sub> I <sub>7</sub>                                                                                                           | 0.16                                  | $5.0 \times 10^{10}$   | $\tau_{\text{rise}} = 40 \text{ms}$<br>$\tau_{\text{decay}} = 40 \text{ms}$         | [8] |

[1] L. Lu, Y. Ma, J. Wang, Y. Liu, S. Han, X. Liu, W. Guo, H. Xu, J. Luo and Z. Sun, *Chem. Eur. J.*, 2021, **27**, 9267-9271.

[2] Y. Liu, Z. Wu, X. Liu, S. Han, Y. Li, T. Yang, Y. Ma, M. Hong, J. Luo, and Z. Sun, *Adv. Opt Mater.*, 2019, **7**, 1901049-1901054.

[3] L. Li, Z. Sun, P. Wang, W. Hu, S. Wang, C. Ji, M. Hong, J. Luo, *Angew. Chem. Int. Ed.*, 2017, **56**, 12150 -12154

[4] J. Zhou, Y. Chu and J. Huang, *ACS Appl. Mater. Inter.*, 2016, **8**, 25660-25666.

[5] S. Han, P. Wang, J. Zhang, X. Liu, Z. Sun, X. Huang, L. Li, C. Ji, W. Zhang, B. Teng, W. Hu, M. Hong and J. Luo, *Laser Photonics Rev.*, 2018, **12**, 1800060.

[6] L. Li, X. Liu, Y. Li, Z. Xu, Z. Wu, S. Han, K. Tao, M. Hong, J. Luo and Z. Sun, *J. Am. Chem. Soc.*, 2019, **141**, 2623-2629.

[7] X. Liu, S. Wang, P. Long, L. Li, Y. Peng, Z. Xu, S. Han, Z. Sun, M. Hong, J. Luo, *Angew. Chem. Int. Ed.*, 2019, **58**, 14504.–14508

[8] I.-H. Park, K. C. Kwon, Z. Zhu, X. Wu, R. Li, Q.-H. Xu and K. P. Loh, *J. Am. Chem. Soc.*, 2020, **142**, 18592-18598.
